# Supplementary material
Source: publisher figshare collection journal article supplement (https://frontiersin.figshare.com/ndownloader/files/18088799)
Supplement: Supplementary file 1 [file 18088799]

**Supplementary Information:**


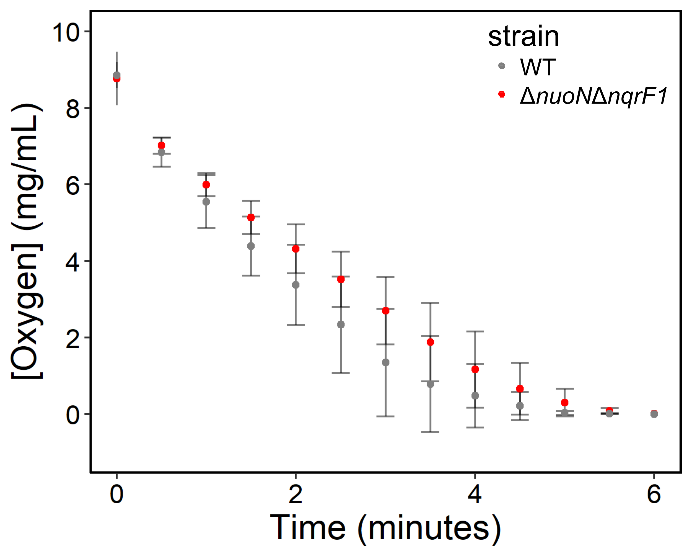


**Figure S1:** Oxygen consumption of WT and Δ*nuoN*Δ*nqrF1* grown in 50 mL culture volumes of M5 supplemented with 0.1% (w/v) tryptone and 20 mM d,l-lactate. 25 mL of oxygen saturated culture were transferred to a 50 mL conical tube and oxygen concentration was measured over time using an optical DO probe.
